# Supplementary material
Source: PubMed Central journal article supplement (PMC2701482)
Supplement: NIHMS89138-supplement-gel.pdf [file NIHMS89138-supplement-gel.pdf]

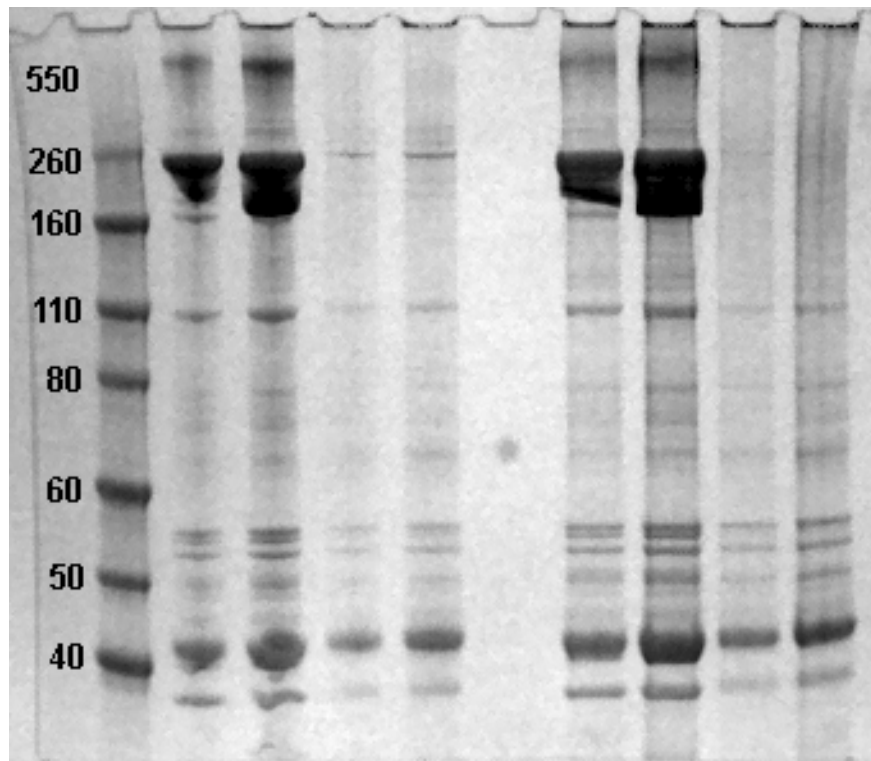

**Fig. 1.** SDS-PAGE of cross-linked myofibrils. The lanes (from left to right) are:  $M_w$  markers, 10  $\mu$ L of WT myofibrils, 20  $\mu$ L of WT myofibrils, 10  $\mu$ L of cross-linked WT myofibrils, 20  $\mu$ L of cross-linked WT myofibrils, blank, 10  $\mu$ L of D166V myofibrils, 20  $\mu$ L of D166V myofibrils, 10  $\mu$ L of cross-linked D166V myofibrils, 20  $\mu$ L of cross-linked D166V myofibrils. 8% gel, 1 mg/mL myofibrils. Gel analyzed by Fluor Chem HD2 Gel Imaging System (Alpha Innotech Corporation, San Leandro, CA) using AlphaEase FC software, Version 6.0.0 (Alpha Innotech).
